# Supplementary material for: Grp94 Inhibitor HCP1 Inhibits Human Dermal Fibroblast Senescence
Source: MDPI journal article supplement (doi:10.3390/genes13091651), 2022-09-14
Supplement: s1 [file s1]

## Supplementary methods

### Cell viability assay

HDFs were seeded onto 96-well plates, and then treated with 0.1% DMSO (as control) or HCP1 at indicated concentration for 48 h. Cell viability was determined by sulforhodamine B (SRB) assay according to the manufacturer's instructions.

### Supplementary figure and figure legend

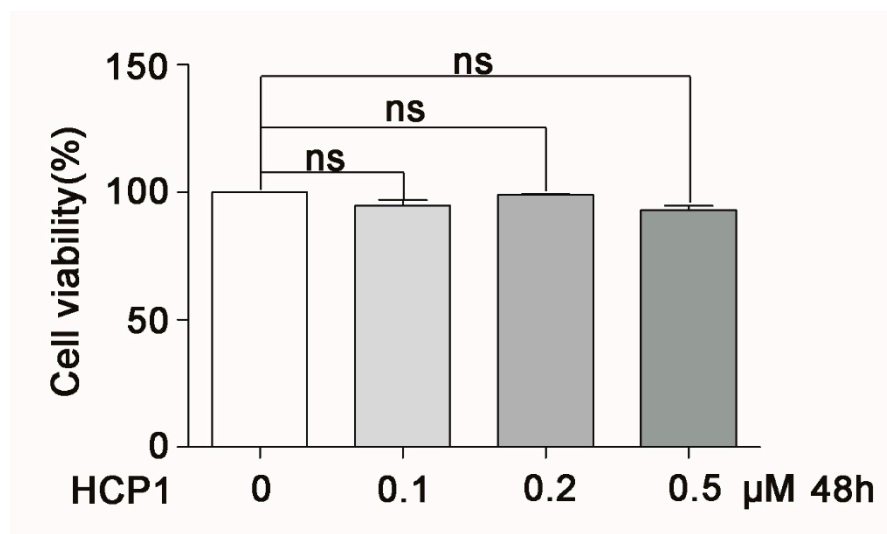

**Figure S1.** The senescent HDFs were treated with different concentrations of HCP1 for 48h, and the cell viability was detected by SRB.
